# Supplementary material for: Phase 1 trial of vamorolone, a first-in-class steroid, shows improvements in side effects via biomarkers bridged to clinical outcomes
Source: PubMed Central journal article supplement (PMC6136660; doi:10.1016/j.steroids.2018.02.010), 2018-03-08
Supplement: NIHMS965660-supplement.pdf [file NIHMS965660-supplement.pdf]

Supplementary Materials:

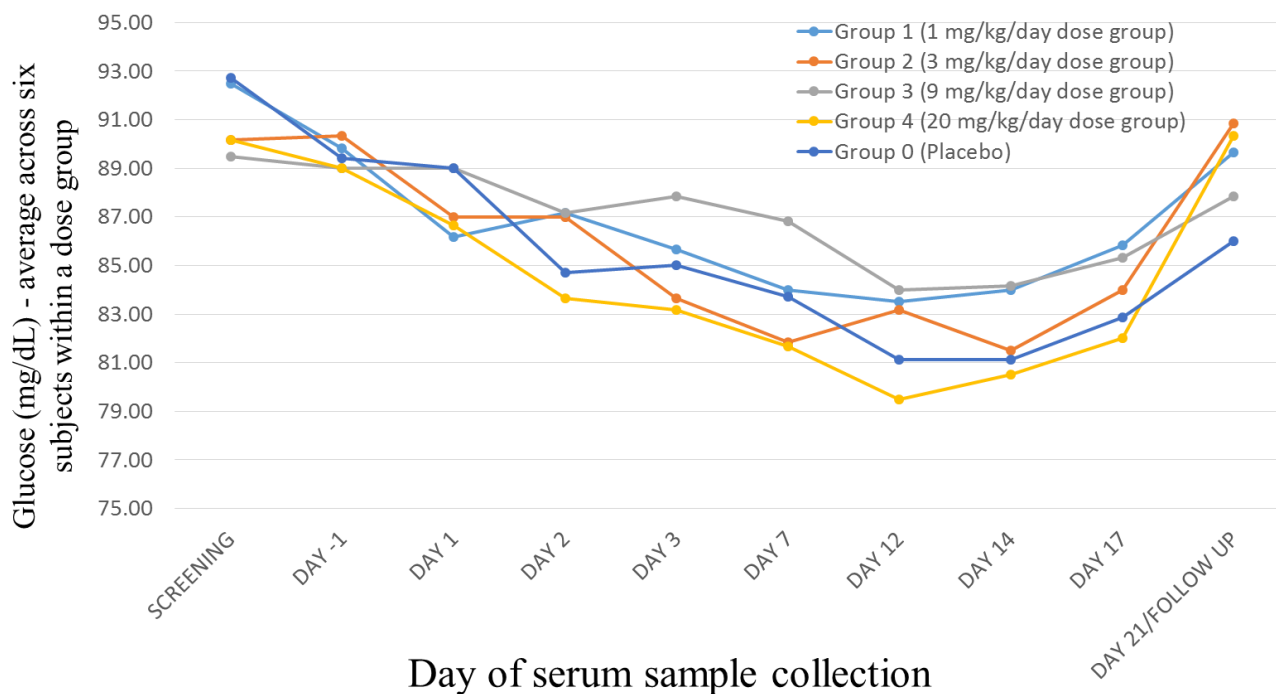

**Supplemental Figure 1. Glucose measures of vamorolone-treated adult volunteers are not significantly different from placebo.** Fasting blood glucose levels were measured on the mornings of the indicated days, with vamorolone or placebo treatment on days 1 – 14. Days 14-21 are recovery time points. Placebo subjects showed a decline over time in the Phase 1 in-patient unit, possibly due to diet, but these differences were similar to all vamorolone-treated groups. This data shows that vamorolone does not cause insulin resistance as seen with glucocorticoids.

1  
2  
3  
4  
5  
6  
7  
8  
9  
10  
11  
12  
13  
14  
15  
16  
17  
18  
19  
20  
21  
22  
23  
24  
25  
26  
27  
28  
29  
30  
31  
32  
33  
34  
35  
36  
37  
38  
39  
40  
41  
42  
43  
44  
45  
46  
47  
48  
49  
50  
51  
52  
53  
54  
55  
56  
57  
58  
59  
60  
61  
62  
63  
64  
65

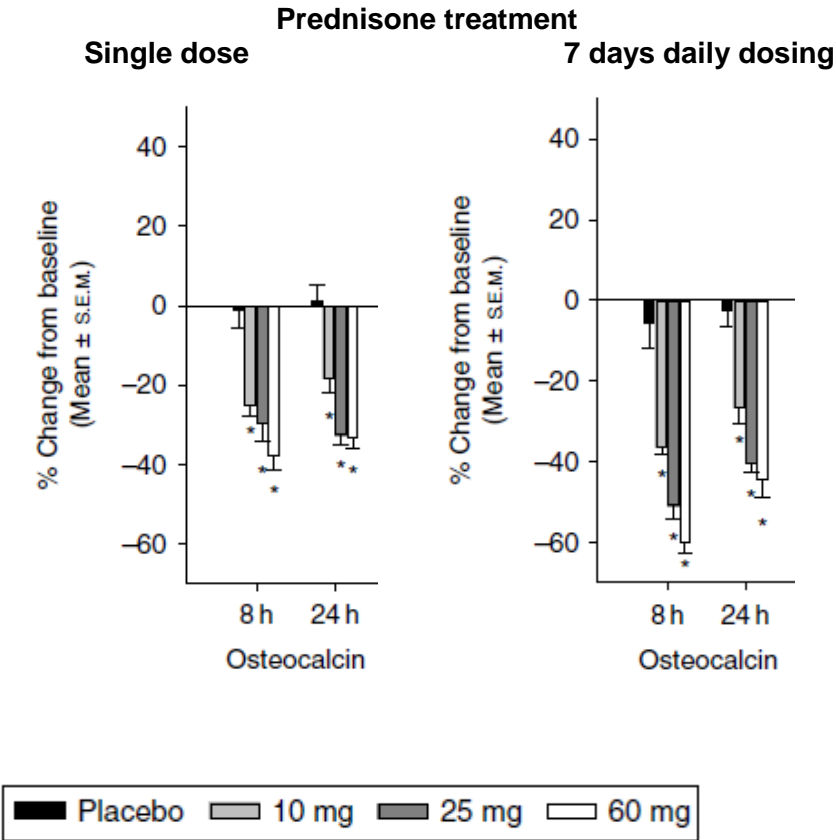

**Equivalencies                      0.125 mg/kg   0.31 mg/kg   0.75 mg/kg**

**Supplemental Figure 2. Serum levels of a biomarker of bone formation, osteocalcin, are significantly decreased by 0.125 mg/kg of prednisone (taken from Kauh et al. 2013) (Error! Bookmark not defined.).** A 10 mg dose (equivalent to ~0.125 mg/kg) of prednisone shows significant declines in blood levels of osteocalcin both 8 hours after a single dose, and after 7 days of daily dosing. In contrast, vamorolone showed no declines through 20 mg/kg/day. Each prednisone dosed group was compared to placebo using a non-parametric test and reported p-values are adjusted for multiple comparisons; \* indicates a statistically significant difference from placebo at the  $p \leq 0.05$  level.

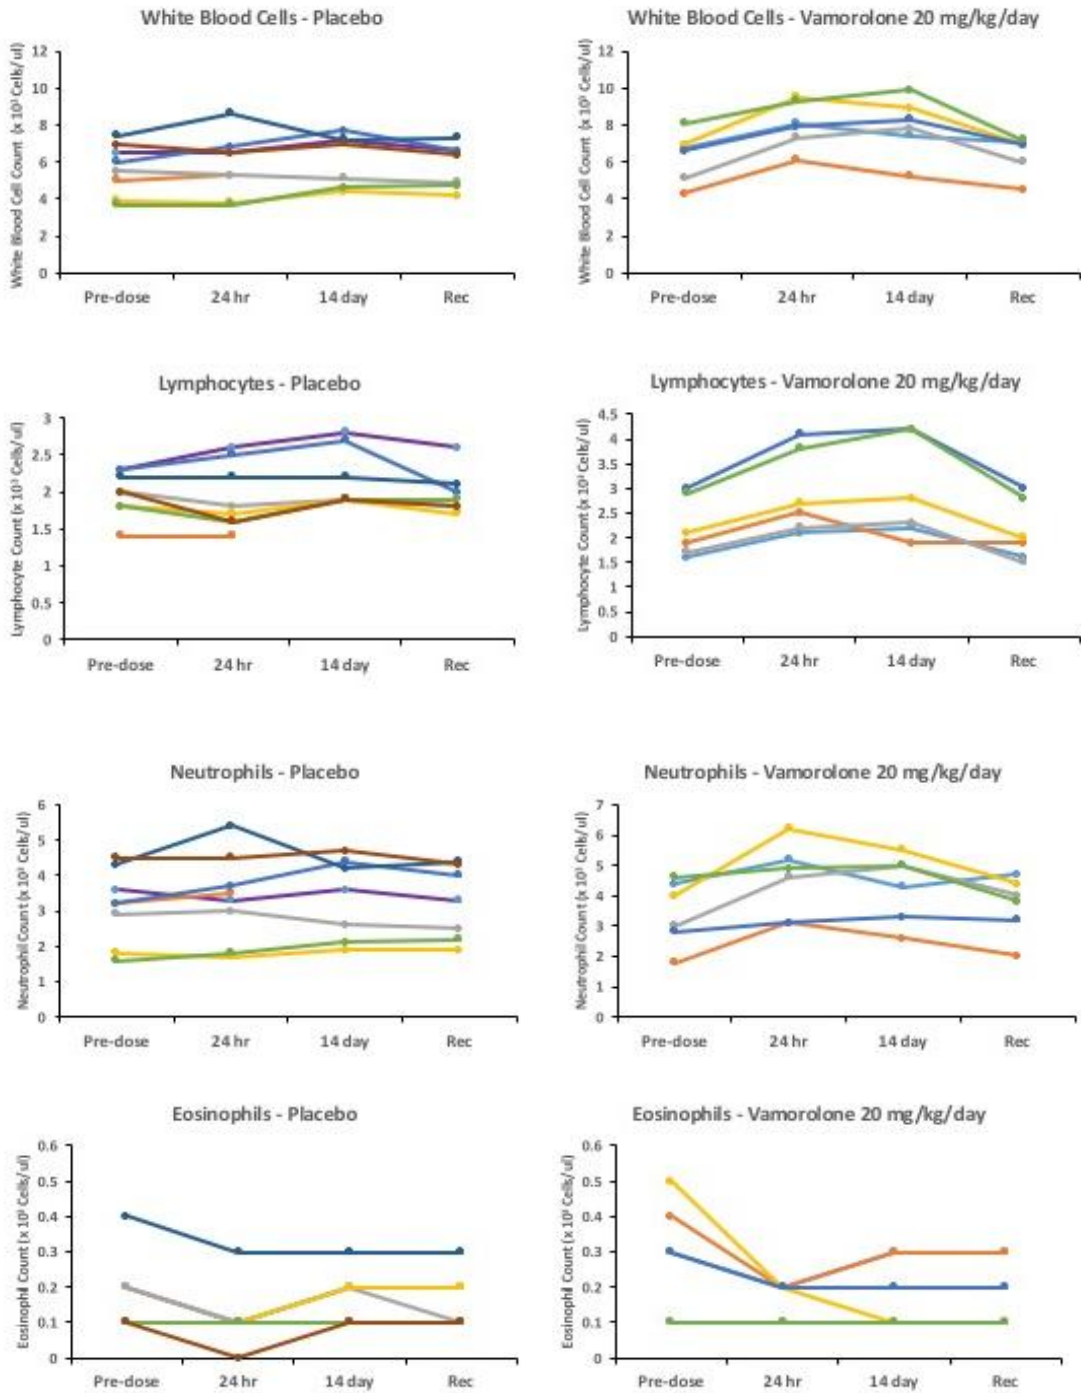

**Supplemental Figure 3. Differential blood counts are not significantly different from placebo.** White blood cells and subsets (lymphocytes, neutrophils, eosinophils) were measured at screening, day -1, pre-dose on days 1-14, day 17, and at follow-up (recovery). Day 1 (pre-dose), Day 2 (24 hr after first dose), Day 14 and follow-up (recovery) time points are graphed

1  
2  
3  
4  
5  
6  
7  
8  
9  
10  
11  
12  
13  
14  
15  
16  
17  
18  
19  
20  
21  
22  
23  
24  
25  
26  
27  
28  
29  
30  
31  
32  
33  
34  
35  
36  
37  
38  
39  
40  
41  
42  
43  
44  
45  
46  
47  
48  
49  
50  
51  
52  
53  
54  
55  
56  
57  
58  
59  
60  
61  
62  
63  
64  
65

below. Dosing was halted on Day 9 for one patient in the 20 mg/kg/day cohort (orange line) and one patient in the placebo cohort (purple line).

**Supplemental Tables:**

**All data shown mean ± SEM**

**Supplemental Table 1. Blood glucose measures: Single ascending dose study.**

| Dose       | Time Point (mg/dL)     |                     |                  |                    |                    |                    |                 |
|------------|------------------------|---------------------|------------------|--------------------|--------------------|--------------------|-----------------|
|            | Screening <sup>a</sup> | Day -1 <sup>b</sup> | <2 hours predose | 24 Hours Post Dose | 48 Hours Post Dose | 72 Hours Post Dose | Follow-up Visit |
| Placebo    | 97 ± 2                 | 92 ± 1              | 95 ± 1           | 91 ± 2             | 89 ± 2             | 90 ± 1             | 94 ± 2          |
| 0.1 mg/kg  | 94 ± 4                 | 99 ± 3              | 95 ± 3           | 95 ± 4             | 95 ± 3             | 94 ± 4             | 98 ± 4          |
| 0.3 mg/kg  | 93 ± 2                 | 91 ± 2              | 93 ± 2           | 91 ± 2             | 90 ± 2             | 91 ± 1             | 88 ± 4          |
| 1.0 mg/kg  | 92 ± 3                 | 92 ± 3              | 93 ± 3           | 86 ± 3             | 88 ± 3             | 86 ± 3             | 93 ± 2          |
| 3.0 mg/kg  | 96 ± 5                 | 89 ± 3              | 92 ± 4           | 93 ± 3             | 89 ± 4             | 88 ± 3             | 91 ± 5          |
| 8.0 mg/kg  | 89 ± 4                 | 90 ± 5              | 86 ± 3           | 91 ± 4             | 87 ± 3             | 89 ± 4             | 94 ± 4          |
| 20.0 mg/kg | 93 ± 3                 | 94 ± 3              | 97 ± 4           | 91 ± 2             | 86 ± 2             | 88 ± 2             | 89 ± 3          |

**Supplemental Table 2. Blood glucose measures: Multiple ascending dose study.**

| Dose       | Time Point (md/dL)     |                     |                    |                    |                    |                    |                     |                     |                     |                     |
|------------|------------------------|---------------------|--------------------|--------------------|--------------------|--------------------|---------------------|---------------------|---------------------|---------------------|
|            | Screening <sup>a</sup> | Day -1 <sup>b</sup> | Day 1 <sup>c</sup> | Day 2 <sup>c</sup> | Day 3 <sup>c</sup> | Day 7 <sup>c</sup> | Day 12 <sup>c</sup> | Day 14 <sup>d</sup> | Day 17 <sup>d</sup> | Day 21 <sup>e</sup> |
| Placebo    | 93 ± 2                 | 90 ± 1              | 90 ± 2             | 85 ± 1             | 85 ± 1             | 85 ± 1             | 85 ± 4              | 81 ± 1              | 83 ± 1              | 86 ± 2              |
| 1.0 mg/kg  | 92 ± 1                 | 90 ± 2              | 86 ± 1             | 87 ± 2             | 86 ± 2             | 84 ± 2             | 83 ± 1              | 84 ± 1              | 86 ± 1              | 90 ± 3              |
| 3.0 mg/kg  | 90.1 ± 1.5             | 90 ± 1              | 87 ± 1             | 87 ± 1             | 84 ± 2             | 82 ± 1             | 83.1 ± 1.4          | 81 ± 2              | 84 ± 1              | 91 ± 2              |
| 9.0 mg/kg  | 89 ± 3                 | 89 ± 1              | 89 ± 2             | 87 ± 1             | 88 ± 2             | 87 ± 2             | 84 ± 2              | 84 ± 2              | 85 ± 2              | 88 ± 2              |
| 20.0 mg/kg | 90 ± 3                 | 89 ± 1              | 87 ± 1             | 84 ± 1             | 83 ± 1             | 82 ± 1             | 80 ± 2              | 80 ± 2              | 81 ± 2              | 91 ± 3              |

<sup>a</sup> Up to 30 days prior to randomization (day 1)

<sup>b</sup> Up to 24 hours prior to first dose

<sup>c</sup> Predose (within 2 hours prior to dosing)

<sup>d</sup> 3 days after last dose (Day 14)

<sup>e</sup> Follow-up visit

**Supplemental Table 3. Osteocalcin: Multiple ascending dose**

| Dose       | Osteocalcin: Time Point (ng/ml) |                    |                               |                     |                     |                     |
|------------|---------------------------------|--------------------|-------------------------------|---------------------|---------------------|---------------------|
|            | Day 1 (predose) <sup>a</sup>    | Day 1 <sup>b</sup> | Day 14 (predose) <sup>a</sup> | Day 14 <sup>b</sup> | Day 15 <sup>c</sup> | Day 17 <sup>d</sup> |
| Placebo    | 46.3 ± 9.7                      | 40.1 ± 7.4         | 42.7 ± 8.8                    | 34.0 ± 6.7          | 40.8 ± 7.9          | 38.8 ± 6.2          |
| 1.0 mg/kg  | 33.2 ± 11.5                     | 27.4 ± 9.3         | 30.3 ± 9.7                    | 21.0 ± 7.8          | 28.8 ± 9.3          | 25.9 ± 8.0          |
| 3.0 mg/kg  | 13.7 ± 11.6                     | 13.6 ± 11.5        | 17.1 ± 13.3                   | 13.0 ± 11.0         | 16.1 ± 12.5         | 13.9 ± 9.5          |
| 9.0 mg/kg  | 32.9 ± 8.6                      | 20.4 ± 4.7         | 24.0 ± 6.4                    | 18.7 ± 4.3          | 26.7 ± 5.2          | 33.5 ± 7.2          |
| 20.0 mg/kg | 31.5 ± 6.7                      | 20.2 ± 4.6         | 32.8 ± 7.6                    | 17.0 ± 3.7          | 27.8 ± 5.9          | 34.6 ± 6.1          |

**Supplemental Table 4. CTX1: Multiple ascending dose**

| Dose       | CTX1: Time Point (ng/ml)     |                    |                               |                     |                     |                     |
|------------|------------------------------|--------------------|-------------------------------|---------------------|---------------------|---------------------|
|            | Day 1 (predose) <sup>a</sup> | Day 1 <sup>b</sup> | Day 14 (predose) <sup>a</sup> | Day 14 <sup>b</sup> | Day 15 <sup>c</sup> | Day 17 <sup>d</sup> |
| Placebo    | 0.66 ± 0.12                  | 0.28 ± 0.05        | 0.81 ± 0.21                   | 0.30 ± 0.07         | 0.88 ± 0.22         | 0.84 ± 0.22         |
| 1.0 mg/kg  | 0.50 ± 0.11                  | 0.22 ± 0.02        | 0.58 ± 0.12                   | 0.22 ± 0.01         | 0.68 ± 0.16         | 0.55 ± 0.09         |
| 3.0 mg/kg  | 0.31 ± 0.05                  | 0.18 ± 0.00        | 0.48 ± 0.13                   | 0.18 ± 0.00         | 0.48 ± 0.10         | 0.46 ± 0.12         |
| 9.0 mg/kg  | 0.59 ± 0.11                  | 0.19 ± 0.006       | 0.73 ± 0.14                   | 0.23 ± 0.03         | 0.77 ± 0.13         | 0.60 ± 0.10         |
| 20.0 mg/kg | 0.70 ± 0.14                  | 0.22 ± 0.02        | 0.88 ± 0.12                   | 0.29 ± 0.06         | 0.92 ± 0.14         | 0.76 ± 0.10         |

<sup>a</sup> Up to 30 days prior to randomization (day 1)

<sup>b</sup> Up to 24 hours prior to first dose

<sup>c</sup> Predose (within 2 hours prior to dosing)

<sup>d</sup> 3 days after last dose (Day 14)

<sup>e</sup> Follow-up visit

### Supplemental Table 5. White blood cells counts: Multiple ascending dose study

| Dose       | Time Point             |                     |                    |                    |                    |                    |                     |                     |                     |                     |
|------------|------------------------|---------------------|--------------------|--------------------|--------------------|--------------------|---------------------|---------------------|---------------------|---------------------|
|            | Screening <sup>a</sup> | Day -1 <sup>b</sup> | Day 1 <sup>c</sup> | Day 2 <sup>c</sup> | Day 3 <sup>c</sup> | Day 7 <sup>c</sup> | Day 12 <sup>c</sup> | Day 14 <sup>c</sup> | Day 17 <sup>d</sup> | Day 21 <sup>e</sup> |
| Placebo    | 5.8 ± 1.6              | 6.0 ± 1.2           | 5.6 ± 1.4          | 5.8 ± 1.6          | 6.2 ± 1.6          | 5.8 ± 1.2          | 6.4 ± 1.6           | 6.2 ± 1.4           | 5.8 ± 1.2           | 6.9 ± 2.9           |
| 1.0 mg/kg  | 5.9 ± 2.2              | 5.5 ± 0.8           | 5.2 ± 1.0          | 5.3 ± 0.9          | 5.4 ± 0.8          | 5.9 ± 0.7          | 6.1 ± 0.9           | 5.9 ± 0.9           | 5.7 ± 0.6           | 5.5 ± 0.7           |
| 3.0 mg/kg  | 6.2 ± 2.9              | 6.1 ± 1.9           | 5.8 ± 2.0          | 5.9 ± 1.5          | 6.1 ± 2.2          | 6.3 ± 2.0          | 6.0 ± 2.0           | 5.8 ± 1.8           | 6.6 ± 1.6           | 6.3 ± 1.6           |
| 9.0 mg/kg  | 5.2 ± 1.3              | 5.5 ± 1.1           | 5.2 ± 1.1          | 6.7 ± 1.2          | 6.8 ± 1.0          | 6.6 ± 1.3          | 6.8 ± 0.9           | 6.8 ± 1.3           | 5.5 ± 0.7           | 5.2 ± 1.1           |
| 20.0 mg/kg | 6.1 ± 1.1              | 7.3 ± 1.1           | 6.3 ± 1.4          | 8.0 ± 1.3          | 7.9 ± 0.7          | 8.2 ± 1.0          | 8.3 ± 0.5           | 8.5 ± 0.4           | 6.8 ± 0.2           | 6.8 ± 0.4           |

### Supplemental Table 6. Neutrophil cell counts: Multiple ascending dose

| Dose       | Time Point             |                     |                    |                    |                    |                    |                     |                     |                     |                     |
|------------|------------------------|---------------------|--------------------|--------------------|--------------------|--------------------|---------------------|---------------------|---------------------|---------------------|
|            | Screening <sup>a</sup> | Day -1 <sup>b</sup> | Day 1 <sup>c</sup> | Day 2 <sup>c</sup> | Day 3 <sup>c</sup> | Day 7 <sup>c</sup> | Day 12 <sup>c</sup> | Day 14 <sup>c</sup> | Day 17 <sup>d</sup> | Day 21 <sup>e</sup> |
| Placebo    | 3.5 ± 1.3              | 3.3 ± 0.8           | 3.1 ± 1.0          | 3.4 ± 1.2          | 3.6 ± 1.2          | 3.4 ± 1.0          | 3.5 ± 1.1           | 3.4 ± 1.2           | 3.2 ± 1.0           | 4.2 ± 2.7           |
| 1.0 mg/kg  | 3.6 ± 2.0              | 2.8 ± 0.9           | 2.8 ± 1.0          | 3.0 ± 0.9          | 2.8 ± 0.8          | 3.1 ± 0.9          | 3.2 ± 1.0           | 3.0 ± 1.0           | 3.0 ± 0.8           | 3.0 ± 0.6           |
| 3.0 mg/kg  | 3.5 ± 1.8              | 3.5 ± 1.4           | 3.4 ± 1.3          | 3.4 ± 1.2          | 3.4 ± 1.4          | 3.3 ± 0.9          | 3.2 ± 1.1           | 3.0 ± 1.1           | 4.0 ± 1.1           | 3.9 ± 1.4           |
| 9.0 mg/kg  | 3.0 ± 1.0              | 2.9 ± 0.6           | 2.9 ± 0.9          | 3.7 ± 1.1          | 3.6 ± 0.7          | 3.4 ± 1.0          | 3.5 ± 0.9           | 3.6 ± 1.0           | 3.1 ± 0.7           | 2.9 ± 1.0           |
| 20.0 mg/kg | 3.5 ± 1.2              | 3.9 ± 1.1           | 3.4 ± 1.1          | 4.5 ± 1.2          | 4.3 ± 1.2          | 4.4 ± 0.7          | 4.4 ± 0.4           | 4.6 ± 0.4           | 4.0 ± 0.3           | 4.0 ± 0.3           |

### Supplemental Table 7. Lymphocytes: Multiple ascending dose

| Dose       | Time Point             |                     |                    |                    |                    |                    |                     |                     |                     |                     |
|------------|------------------------|---------------------|--------------------|--------------------|--------------------|--------------------|---------------------|---------------------|---------------------|---------------------|
|            | Screening <sup>a</sup> | Day -1 <sup>b</sup> | Day 1 <sup>c</sup> | Day 2 <sup>c</sup> | Day 3 <sup>c</sup> | Day 7 <sup>c</sup> | Day 12 <sup>c</sup> | Day 14 <sup>c</sup> | Day 17 <sup>d</sup> | Day 21 <sup>e</sup> |
| Placebo    | 1.8 ± 0.4              | 2.1 ± 0.5           | 2.0 ± 0.3          | 1.9 ± 0.4          | 2.0 ± 0.5          | 1.9 ± 0.3          | 2.3 ± 0.6           | 2.2 ± 0.4           | 2.0 ± 0.3           | 2.0 ± 0.5           |
| 1.0 mg/kg  | 1.8 ± 0.5              | 2.1 ± 0.5           | 1.9 ± 0.4          | 1.8 ± 0.3          | 2.1 ± 0.2          | 2.1 ± 0.3          | 2.3 ± 0.3           | 2.3 ± 0.2           | 2.1 ± 0.4           | 2.0 ± 0.2           |
| 3.0 mg/kg  | 2.0 ± 1.0              | 1.9 ± 0.6           | 1.8 ± 0.6          | 2.0 ± 0.4          | 2.1 ± 0.7          | 2.4 ± 0.8          | 2.1 ± 0.7           | 2.2 ± 0.6           | 2.0 ± 0.5           | 1.8 ± 0.6           |
| 9.0 mg/kg  | 1.7 ± 0.5              | 2.1 ± 0.7           | 1.8 ± 0.4          | 2.5 ± 0.7          | 2.7 ± 0.7          | 2.6 ± 0.6          | 2.8 ± 0.6           | 2.6 ± 0.6           | 1.9 ± 0.5           | 1.8 ± 0.7           |
| 20.0 mg/kg | 2.0 ± 0.5              | 2.6 ± 0.5           | 2.2 ± 0.6          | 2.9 ± 0.8          | 2.9 ± 0.7          | 3.2 ± 0.9          | 3.2 ± 0.4           | 3.1 ± 0.4           | 2.2 ± 0.3           | 2.2 ± 0.3           |

### Supplemental Table 8. Eosinophils: Multiple ascending dose

| Dose       | Time Point             |                     |                    |                    |                    |                    |                     |                     |                     |                     |
|------------|------------------------|---------------------|--------------------|--------------------|--------------------|--------------------|---------------------|---------------------|---------------------|---------------------|
|            | Screening <sup>a</sup> | Day -1 <sup>b</sup> | Day 1 <sup>c</sup> | Day 2 <sup>c</sup> | Day 3 <sup>c</sup> | Day 7 <sup>c</sup> | Day 12 <sup>c</sup> | Day 14 <sup>c</sup> | Day 17 <sup>d</sup> | Day 21 <sup>e</sup> |
| Placebo    | 0.15 ±<br>0.08         | 0.20 ±<br>0.13      | 0.18 ±<br>0.10     | 0.11 ±<br>0.08     | 0.13 ±<br>0.07     | 0.14 ±<br>0.07     | 0.16 ±<br>0.05      | 0.17 ±<br>0.08      | 0.16 ±<br>0.08      | 0.16 ±<br>0.11      |
| 1.0 mg/kg  | 0.13 ±<br>0.08         | 0.18 ±<br>0.10      | 0.17 ±<br>0.08     | 0.17 ±<br>0.08     | 0.17 ±<br>0.08     | 0.20 ±<br>0.14     | 0.20 ±<br>0.09      | 0.18 ±<br>0.08      | 0.17 ±<br>0.08      | 0.15 ±<br>0.10      |
| 3.0 mg/kg  | 0.18 ±<br>0.08         | 0.20 ±<br>0.06      | 0.23 ±<br>0.08     | 0.23 ±<br>0.08     | 0.20 ±<br>0.06     | 0.18 ±<br>0.08     | 0.18 ±<br>0.04      | 0.20 ±<br>0.06      | 0.17 ±<br>0.05      | 0.18 ±<br>0.04      |
| 9.0 mg/kg  | 0.10 ±<br>0.00         | 0.12 ±<br>0.04      | 0.10 ±<br>0.00     | 0.13 ±<br>0.05     | 0.10 ±<br>0.00     | 0.10 ±<br>±0.00    | 0.12 ±<br>0.04      | 0.13 ±<br>0.05      | 0.08 ±<br>0.04      | 0.12 ±<br>0.04      |
| 20.0 mg/kg | 0.25 ±<br>0.14         | 0.32 ±<br>0.16      | 0.28 ±<br>0.16     | 0.17 ±<br>0.05     | 0.15 ±<br>0.08     | 0.15 ±<br>0.08     | 0.12 ±<br>0.02      | 0.16 ±<br>0.04      | 0.16 ±<br>0.04      | 0.26 ±<br>0.02      |

**Supplemental Table 9. Crystallographic data of vamorolone**

| Vamorolone                                                             |                                                                                                                                                                                                                                                                                                                                                                      |
|------------------------------------------------------------------------|----------------------------------------------------------------------------------------------------------------------------------------------------------------------------------------------------------------------------------------------------------------------------------------------------------------------------------------------------------------------|
| Crystal data                                                           |                                                                                                                                                                                                                                                                                                                                                                      |
| Chemical formula                                                       | C <sub>22</sub> H <sub>28</sub> O <sub>4</sub>                                                                                                                                                                                                                                                                                                                       |
| <i>M<sub>r</sub></i>                                                   | 356.44                                                                                                                                                                                                                                                                                                                                                               |
| Crystal system, space group                                            | Orthorhombic, <i>P</i> 2 <sub>1</sub> 2 <sub>1</sub> 2 <sub>1</sub>                                                                                                                                                                                                                                                                                                  |
| Temperature (K)                                                        | 110                                                                                                                                                                                                                                                                                                                                                                  |
| <i>a</i> , <i>b</i> , <i>c</i> (Å)                                     | 8.18746 (9), 18.0748 (2), 37.5595 (4)                                                                                                                                                                                                                                                                                                                                |
| <i>V</i> (Å <sup>3</sup> )                                             | 5558.31 (10)                                                                                                                                                                                                                                                                                                                                                         |
| <i>Z</i>                                                               | 12                                                                                                                                                                                                                                                                                                                                                                   |
| Radiation type                                                         | Cu <i>K</i> α                                                                                                                                                                                                                                                                                                                                                        |
| μ (mm <sup>-1</sup> )                                                  | 0.69                                                                                                                                                                                                                                                                                                                                                                 |
| Crystal size (mm)                                                      | 0.51 × 0.38 × 0.31                                                                                                                                                                                                                                                                                                                                                   |
| Data collection                                                        |                                                                                                                                                                                                                                                                                                                                                                      |
| Diffractometer                                                         | SuperNova, Dual, Cu at zero, Atlas                                                                                                                                                                                                                                                                                                                                   |
| Absorption correction                                                  | Analytical<br><i>CrysAlis PRO</i> , Agilent Technologies, Version 1.171.36.32 (release 02-08-2013 <i>CrysAlis171</i> .NET) (compiled Aug 2 2013, 16:46:58). Analytical numeric absorption correction using a multifaceted crystal model based on expressions derived by R.C. Clark & J.S. Reid. (Clark, R. C. & Reid, J. S. (1995). <i>Acta Cryst.</i> A51, 887-897) |
| <i>T<sub>min</sub></i> , <i>T<sub>max</sub></i>                        | 0.774, 0.844                                                                                                                                                                                                                                                                                                                                                         |
| No. of measured, independent and observed [ <i>I</i> > 2σ( <i>I</i> )] | 36042, 10890, 10330                                                                                                                                                                                                                                                                                                                                                  |

1  
2  
3  
4  
5  
6  
7  
8  
9  
10  
11  
12  
13  
14  
15  
16  
17  
18  
19  
20  
21  
22  
23  
24  
25  
26  
27  
28  
29  
30  
31  
32  
33  
34  
35  
36  
37  
38  
39  
40  
41  
42  
43  
44  
45  
46  
47  
48  
49  
50  
51  
52  
53  
54  
55  
56  
57  
58  
59  
60  
61  
62  
63  
64  
65

|                                                                        |                                                                                                                                |
|------------------------------------------------------------------------|--------------------------------------------------------------------------------------------------------------------------------|
| reflections                                                            |                                                                                                                                |
| $R_{\text{int}}$                                                       | 0.017                                                                                                                          |
| $(\sin \theta/\lambda)_{\text{max}} (\text{\AA}^{-1})$                 | 0.616                                                                                                                          |
| Refinement                                                             |                                                                                                                                |
| $R[F^2 > 2\sigma(F^2)],$<br>$wR(F^2), S$                               | 0.030, 0.089, 1.06                                                                                                             |
| No. of reflections                                                     | 10890                                                                                                                          |
| No. of parameters                                                      | 719                                                                                                                            |
| H-atom treatment                                                       | H-atom parameters constrained                                                                                                  |
| $\Delta\rho_{\text{max}}, \Delta\rho_{\text{min}} (e \text{\AA}^{-3})$ | 0.24, -0.13                                                                                                                    |
| Absolute structure                                                     | Flack x determined using 4305 quotients $[(I+)-(I-)]/[(I+)+(I-)]$ (Parsons, Flack and Wagner, Acta Cryst. B69 (2013) 249-259). |
| Absolute structure parameter                                           | -0.02 (3)                                                                                                                      |
